# Supplementary material for: Synthesis of TiO2@α-Fe2O3 core–shell heteronanostructures by thermal decomposition approach and their application towards sunlight-driven photodegradation of rhodamine B
Source: Royal Society of Chemistry journal article supplement (doi:10.1039/c7nj04892k), 2018-01-01
Supplement: c7nj04892k1.pdf [file c7nj04892k1.pdf]

## Supporting Information

### Synthesis of $\text{TiO}_2@-\alpha\text{-Fe}_2\text{O}_3$ core-shell heteronanostructures by thermal decomposition approach and their application towards sunlight driven photodegradation of Rhodamine B

Jatin Mahajan and Pethaiyan Jeevanandam\*

*Department of Chemistry,  
Indian Institute of Technology Roorkee,  
Roorkee-247667, India*

*\*E-mail: jeevafcy@iitr.ac.in*

*Tel: +91-1332-285444; Fax: 91-1332 -273560.*

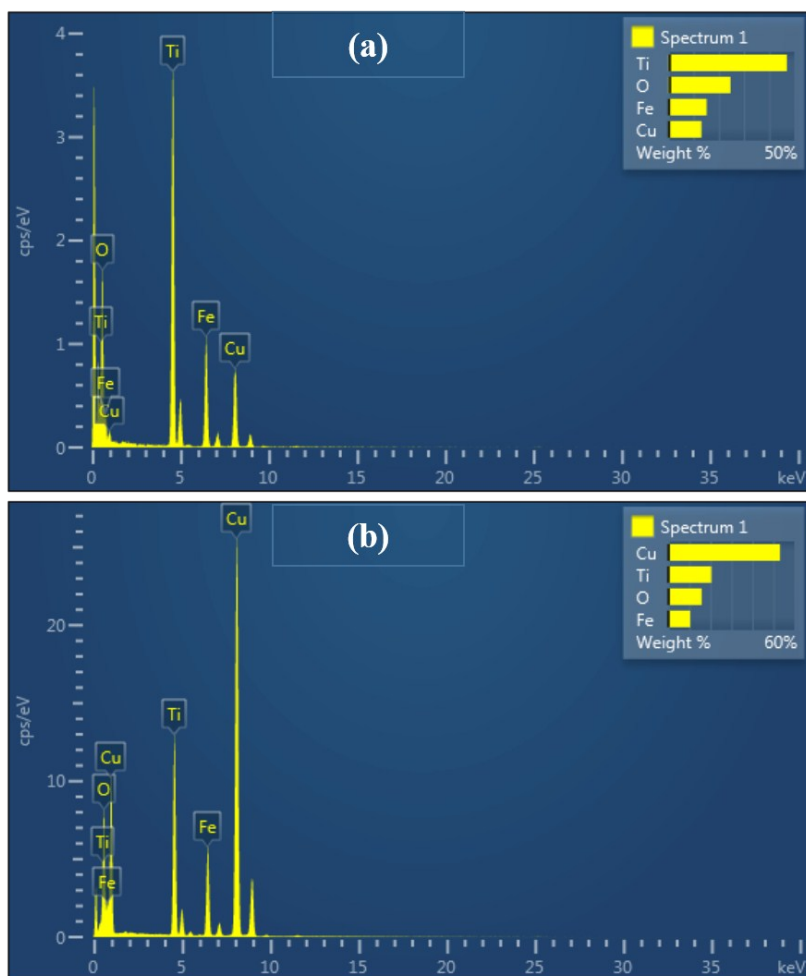

Figure S1: The EDS patterns of (a) CTFO-100 and (b) CTFO-150 observed during the TEM measurements

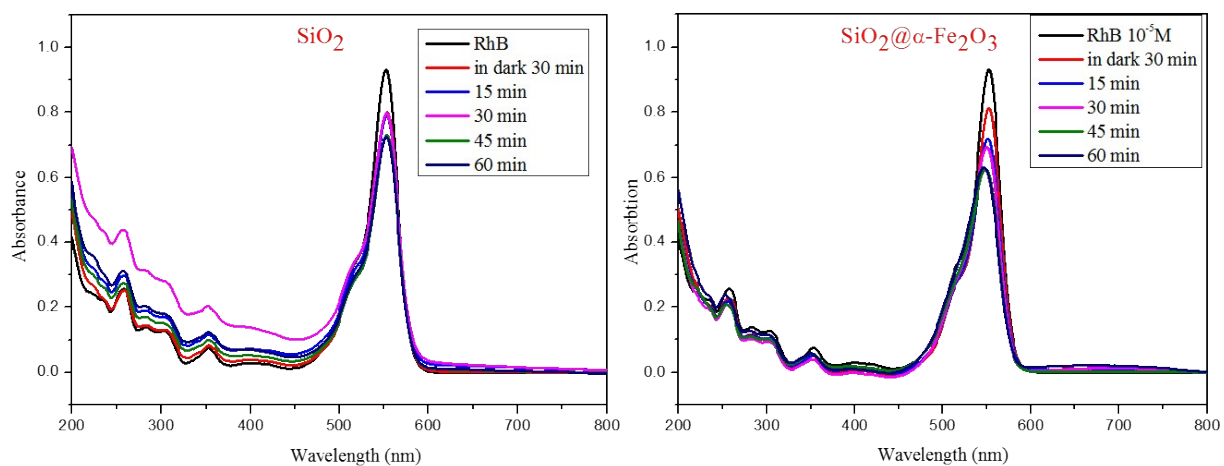

Figure S2: UV-visible spectral results on photodegradation of rhodamine B using pure  $\text{SiO}_2$  and  $\text{SiO}_2@-\alpha\text{-Fe}_2\text{O}_3$  as the catalysts.

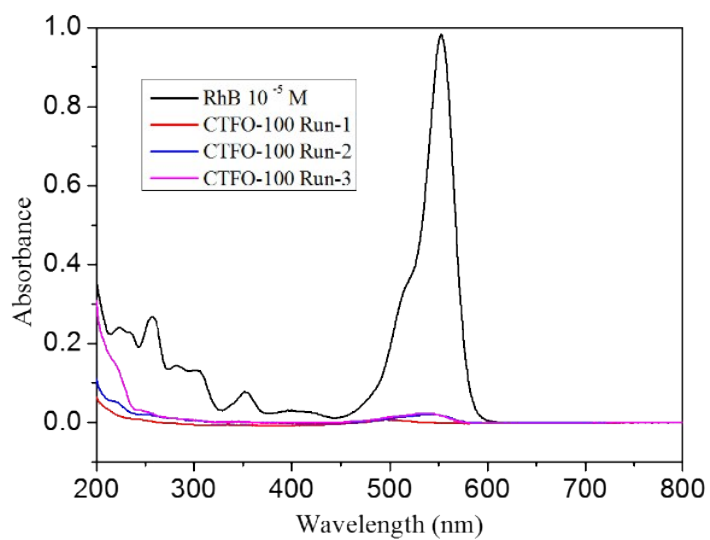

Figure S3: UV-visible spectral results on the photocatalytic degradation of RhB by CTFO-100 indicating its recyclability.
